# Supplementary material for: Structural Transformation and Creativity Induced by Biological Agents during Fermentation of Edible Nuts from Terminalia catappa
Source: MDPI journal article supplement (doi:10.3390/molecules26195874), 2021-09-28
Supplement: s1 [file s1]

**Table S1.** The GC-MS detected phytochemicals in the unfermented aqueous extract of *T. catappa* seeds.

| Peaks | RT     | Area((%) | Similarity Index(%) | Class of Compound     | IUPAC Name                                                | Common Name                                           |
|-------|--------|----------|---------------------|-----------------------|-----------------------------------------------------------|-------------------------------------------------------|
| 1     | 5.025  | 8.67     | 82                  | Carboxylic acid ester | 3-Methyloxirane-2-carboxylic acid                         | trans-2,3-Epoxy-buttersaure                           |
| 2     | 5.733  | 0.81     | 73                  | Fatty acid            | (E)-hex-3-enedioic acid                                   | 3-Hexenedioic acid                                    |
| 3     | 5.917  | 1.24     | 82                  | Alcohol               | hexane-2,3,4,5-tetrol                                     | 1,6-Dideoxy-l-mannitol                                |
| 4     | 6.828  | 0.56     | 68                  | Fatty acid            | 2-amino-4-(2-amino-2-carboxyethyl)sulfanyl-butanoic acid  | dl-Allo-cystathionine                                 |
| 5     | 7.775  | 8.74     | 81                  | Alkylglycerol         | 3-(2,3-dihydroxypropoxy)propane-1,2-diol                  | Diglycerol                                            |
| 6     | 8.082  | 0.55     | 72                  | Fatty acid            | 4-(4-methoxyphenoxy)-4-oxobutanoic acid                   | 4-Methoxyphenyl Hydrogen Succinate                    |
| 7     | 8.917  | 2.04     | 84                  | Pyrrolidinone         | pyrrolidin-2-one                                          | 2-Pyrrolidinone                                       |
| 8     | 8.696  | 1.93     | 70                  | Alcohol               | 1-Methoxy-3-hydroxymethylheptane                          | 2-butyl-4-methoxybutanol                              |
| 9     | 9.100  | 1.30     | 77                  | Ketone                | 3,5-Dihydroxy-6-methyl-2,3-dihydro-4H-pyran-4-one         | 2,3-Dihydro-3,5-dihydroxy-6-methyl-4h-pyran-4-one     |
| 10    | 10.200 | 0.47     | 68                  | Amino acid            | S-[2-Aminoethyl]-dl-cysteine                              | Thiosine                                              |
| 11    | 10.368 | 1.34     | 74                  | Carboxylic acid ester | 1-(1-Hydroxy-1-methyl-ethyl)-cyclobutanecarboxylic acid   | 1-(2-hydroxypropan-2-yl)cyclobutane-1-carboxylic acid |
| 12    | 10.501 | 1.97     | 74                  | Fatty acid            | (2Z)-2-Octenoic acid                                      | 2-Octenoic acid                                       |
| 13    | 10.790 | 0.47     | 69                  | Carboxylic acid ester | 1-Di(tert-butyl)silyloxydodecane                          | Di(tert-butyl)silyl dodecyl ether                     |
| 14    | 10.995 | 0.17     | 67                  | Amide                 | 5-O-Methyl-d-gluconic acid dimethylamide                  | 5-O-Methyl-d-gluconic acid dimethylamide              |
| 15    | 11.391 | 2.85     | 63                  | Alkane                | Sulfide, cyclohexyl isopentyl                             | Sulfide, cyclohexyl isopentyl                         |
| 16    | 11.827 | 6.03     | 89                  | Phenol                | Phenol, 2,6-dimethoxy-                                    | Syringol                                              |
| 17    | 12.249 | 0.44     | 70                  | Fatty acid            | 6-amino-6-oxohexanoic acid                                | Adipamic acid                                         |
| 18    | 12.318 | 1.71     | 90                  | Amino acid            | (2S)-2,5-diamino-5-oxopentanoic acid                      | Glutamine                                             |
| 19    | 12.668 | 0.31     | 68                  | Carboxylic acid       | (1R,2R)-cyclobutane-1,2-dicarboxylic acid                 | 1,2-Cyclobutanedicarboxylic acid, trans-              |
| 20    | 13.633 | 1.79     | 89                  | Fatty acid            | methyl dodecanoate                                        | Methyl laurate                                        |
| 21    | 14.024 | 1.42     | 71                  | Ketone                | 6-hydroxy-3,3a,4,5,6,6a-hexahydrocyclopenta[b]furan-2-one | 6-Hydroxyhexahydrocyclopenta[b]furan-2-one            |
| 22    | 14.102 | 2.43     | 61                  | Ketone                | 3-[(E)-pent-2-enyl]cyclopentane-1,2,4-trione              | 1,2,4-Cyclopentanetrione, 3-(2-pentenyl)-             |

|    |        |      |    |                       |                                                                                                 |                                                                                  |
|----|--------|------|----|-----------------------|-------------------------------------------------------------------------------------------------|----------------------------------------------------------------------------------|
| 23 | 14.205 | 3.52 | 72 | Carboxylic acid ester | 1-(1-Hydroxy-1-methyl-ethyl)-cyclobutanecarboxylic acid                                         | 1-(2-hydroxypropan-2-yl)cyclobutane-1-carboxylic acid                            |
| 24 | 14.328 | 2.62 | 63 | Carboxylic acid ester | 3,3-dimethyl-4-oxocyclopentane-1-carboxylic acid                                                | 3,3-Dimethyl-4-oxocyclopentanecarboxylic acid                                    |
| 25 | 14.535 | 0.95 | 70 | Fatty acid            | 6-amino-6-oxohexanoic acid                                                                      | Adipamic acid                                                                    |
| 26 | 14.634 | 1.23 | 70 | Amine                 | N-[6-(aziridin-1-yl)hexyl]cyclooctanamine                                                       | N-[[6-Cyclooctylaminohexyl]aziridine                                             |
| 27 | 14.686 | 1.72 | 62 | Carboxylic acid ester | [(6E,8E)-trideca-6,8-dien-2-yl] acetate                                                         | E,E-6,8-Tridecadien-2-ol, acetate                                                |
| 28 | 14.818 | 0.93 | 69 | Alcohol               | Cyclooctane-1,4-diol, cis                                                                       | 1,4-Cyclooctanediol                                                              |
| 29 | 14.980 | 0.73 | 64 | Fatty acid ester      | methyl 8-[2-(2-hexylcyclopropyl)cyclopropyl] Octanoate                                          | [1,1'-Bicyclopropyl]-2-octanoic acid, 2'-hexyl-, methyl ester                    |
| 30 | 15.389 | 1.61 | 83 | Fatty acid ester      | methyl 12-methyltridecanoate                                                                    | Methyl isomyristate                                                              |
| 31 | 15.593 | 1.79 | 70 | Amine                 | N-[6-(aziridin-1-yl)hexyl]cyclooctanamine                                                       | N-[[6-Cyclooctylaminohexyl]aziridine                                             |
| 32 | 15.728 | 2.74 | 67 | Fatty acid            | (E)-undec-2-enoic acid                                                                          | 2-Undecenoic acid                                                                |
| 33 | 15.826 | 1.93 | 71 | Ketone                | 4,4,7a-trimethyl-3a,5,6,7-tetrahydro-3H-1-benzofuran-2-one                                      | Tetrahydroactinidiolide                                                          |
| 34 | 16.334 | 1.86 | 60 | Ketone                | 2-Methoxy-4,4-dimethyl-2-cyclohexen-1-one                                                       | 2-methoxy-4,4-dimethylcyclohex-2-en-1-one                                        |
| 35 | 16.631 | 0.89 | 65 | Fatty acid            | (E)-undec-2-enoic acid                                                                          | Trans-2-Undecenoic acid                                                          |
| 36 | 16.870 | 1.53 | 90 | Fatty acid ester      | methyl hexadecanoate                                                                            | Methyl palmitate                                                                 |
| 37 | 17.045 | 2.19 | 80 | Fatty acid            | (Z)-octadec-9-enoic acid                                                                        | oleic acid                                                                       |
| 38 | 17.165 | 5.20 | 94 | Fatty acid            | hexadecanoic acid                                                                               | palmitic acid                                                                    |
| 39 | 17.744 | 2.80 | 85 | Fatty acid            | cis-9-Hexadecenoic acid                                                                         | palmitoleic acid                                                                 |
| 40 | 18.034 | 2.97 | 91 | Fatty acid ester      | methyl (Z)-octadec-9-enoate                                                                     | Methyl oleate                                                                    |
| 41 | 18.179 | 2.36 | 68 | Fatty acid ester      | methyl undec-10-ynoate                                                                          | Methyl 10-undecynoate                                                            |
| 42 | 18.314 | 3.57 | 84 | Aldehyde              | tetradec-13-enal                                                                                | 13-Tetradecenal                                                                  |
| 43 | 18.433 | 0.94 | 75 | Fatty acid            | methyl 8-[2-(2-hexylcyclopropyl)cyclopropyl]octanoate                                           | [1,1'-Bicyclopropyl]-2-octanoic acid, 2'-hexyl-, methyl ester                    |
| 44 | 18.577 | 0.46 | 75 | Fatty acid ester      | Cyclopropaneoctanoic acid, 2-[[2-[(2-ethylcyclopropyl)methyl]cyclopropyl]methyl]-, methyl ester | Methyl 8-[2-((2-ethylcyclopropyl)methyl)cyclopropyl)methyl]cyclopropyl]octanoate |
| 45 | 18.990 | 0.51 | 70 | Fatty acid            | 17-Octadecynoic acid                                                                            | Alkynyl Stearic Acid                                                             |

|    |        |      |    |                  |                                                                                                              |                                                           |
|----|--------|------|----|------------------|--------------------------------------------------------------------------------------------------------------|-----------------------------------------------------------|
| 46 | 19.117 | 2.99 | 74 | Amine            | N-[2-(aziridin-1-yl)ethyl]cyclooctanamine                                                                    | N-[2-[Cyclooctylamino]ethyl]aziridine                     |
| 47 | 19.241 | 1.19 | 80 | Fatty acid ester | 3-hydroxybutan-2-yl octadecanoate                                                                            | 2-Hydroxy-1-methylpropyl stearate                         |
| 48 | 19.645 | 0.44 | 69 | Fatty acid       | 7-oxooctanoic acid                                                                                           | 7-Keto-N-Caprylic Acid                                    |
| 49 | 19.762 | 1.57 | 69 | Amine            | (Z)-octadec-9-en-1-amine                                                                                     | Oleylamine                                                |
| 50 | 20.272 | 0.48 | 69 | Fatty acid ester | 9,12,15-Octadecatrienoic acid, 2-[(trimethylsilyl)oxy]-1-[[[(trimethylsilyl)oxy]methyl]ethyl ester, (Z,Z,Z)- | 2-Monolinolenin, 2TMS derivative                          |
| 51 | 20.357 | 0.64 | 65 | Fatty acid ester | ethyl<br>(Z)-11-(3-ethenylcyclopentyl)<br>undec-10-enoate                                                    | 11-(3-Ethenylcyclopentyl)undec-10-enoic acid, ethyl ester |
| 52 | 21.025 | 0.38 | 75 | Fatty acid ester | 9,12,15-Octadecatrienoic acid, 2-[(trimethylsilyl)oxy]-1-[[[(trimethylsilyl)oxy]methyl]ethyl ester, (Z,Z,Z)- | 2-Monolinolenin, 2TMS derivative                          |

**Table S2.** The GC-MS detected phytochemicals in the aqueous extract of fermented *T. catappa* seeds.

| Peaks | RT     | Area (%) | Similarity Index (%) | Class of Compound Class    | IUPAC name                                                                             | Common name                                               |
|-------|--------|----------|----------------------|----------------------------|----------------------------------------------------------------------------------------|-----------------------------------------------------------|
| 1     | 4.513  | 1.81     | 91                   | Alcohol                    | Butane-2,3-diol                                                                        | 2,3-butanediol                                            |
| 2     | 4.700  | 2.21     | 81                   | Carboxylic acid ester      | Acetic acid, ethoxyhydroxy-, ethyl ester                                               | Ethyl glyoxylate hemiacetal                               |
| 3     | 4.886  | 16.20    | 87                   | Fatty acid                 | Butanoic acid                                                                          | Butyric acid                                              |
| 4     | 5.292  | 19.66    | 89                   | Alcohol                    | propane-1,3-diol                                                                       | Trimethylene glycol                                       |
| 5     | 6.365  | 5.42     | 84                   | Alcohol                    | hexane-2,3,4,5-tetrol                                                                  | 1,6-Dideoxy-l-mannitol                                    |
| 6     | 6.527  | 3.24     | 83                   | Fatty acid                 | Hexanoic acid                                                                          | Caproic acid                                              |
| 7     | 8.348  | 2.89     | 85                   | Alcohol                    | 2,2-dimethylpentan-1-ol                                                                | Neoheptanol                                               |
| 8     | 8.583  | 1.76     | 68                   | Fatty acid ester           | 11-cyclopent-2-en-1-yl undecanoic acid                                                 | Hydnocarpic acid                                          |
| 9     | 8.912  | 0.86     | 82                   | Fatty acid ester           | propyl butanoate                                                                       | Propyl butyrate                                           |
| 10    | 9.348  | 0.31     | 77                   | Fatty acid                 | (Z)-oct-2-enoic acid                                                                   | 2-Octenoic acid                                           |
| 11    | 9.612  | 0.19     | 81                   | Amide                      | 2,3,4,6-tetrahydroxy-5-methoxy-N,N-dimethylhexanamide                                  | 5-O-Methyl-d-gluconic acid dimethylamide                  |
| 12    | 10.055 | 6.63     | 96                   | piperidones (delta-lactam) | 2-Piperidinone                                                                         | Valerolactam                                              |
| 13    | 10.125 | 0.19     | 82                   | Alcohol                    | 1-(4a,6,7,8a-tetrahydro-4H-[1,3]dioxino[4,5-b][1,4]dioxin-4-yl)ethanol                 | 1,3,2,4-Dimethylene-d-epirhamnitol                        |
| 14    | 10.342 | 0.54     | 65                   | Fatty acid ester           | 11-cyclopent-2-en-1-ylundecanoic acid                                                  | Hydnocarpic acid                                          |
| 15    | 10.443 | 0.24     | 81                   | Carboxylic acid ester      | 4-hydroxy-2-methylpyrrolidine-2-carboxylic acid                                        | 4-Hydroxy-2-methylpyrrolidine-2-carboxylic acid           |
| 16    | 10.528 | 0.78     | 78                   | Azine                      | 2H-1,3-Benzoxazine, 6-chloro-3-cyclohexyl-3,4-dihydro-                                 |                                                           |
| 17    | 10.970 | 0.65     | 86                   | Catechol                   | 1,2-Benzenediol, 3-methoxy-                                                            | 3-methoxycatechol                                         |
| 18    | 11.069 | 0.31     | 72                   | Carboxylic acid ester      | methyl 2,6-dimethyl-4,4a,8,8a-tetrahydro-[1,3]dioxino[5,4-d][1,3]dioxine-4-carboxylate | 2,4:3,5-Diethylidene-xylosecarboxylic acid, methyl(ester) |
| 19    | 11.137 | 0.36     | 73                   | Fatty acid ester           | Hexanoic acid, propyl ester                                                            | Propyl caproate                                           |
| 20    | 11.254 | 0.54     | 69                   | Alcohol                    | 6-(hydroxymethyl)oxane-2,3,5-triol                                                     | 3-Deoxyglucose                                            |
| 21    | 11.416 | 1.56     | 73                   | Amino acid                 | 2,6-diamino-4-chlorohexanoic acid                                                      | 4-Chlorolysine                                            |
| 22    | 11.679 | 1.38     | 72                   | Alcohol                    | 4-(hydroxymethyl)-7-methyl-1,3-dioxepane-5,6-diol                                      | 2,5-Methylene-d,l-rhamnitol                               |
| 23    | 11.853 | 2.11     | 59                   | Phenol                     | 2,6-dimethoxyphenol                                                                    | Syringol                                                  |
| 24    | 12.269 | 1.97     | 70                   | Ketone                     | 1-(2-hydroxyethyl)pyrrolidine-2,5-dione                                                | N-(2-Hydroxyethyl)succinimide                             |
| 25    | 12.406 | 1.20     | 72                   | Nitrile                    | bicyclo[4.2.0]octa-2,4-diene-7-carbonitrile                                            | Bicyclo[4.2.0]octa-2,4-diene-7-carbonitrile               |

|    |        |      |    |                       |                                                                                                                                |                                                                                                                     |
|----|--------|------|----|-----------------------|--------------------------------------------------------------------------------------------------------------------------------|---------------------------------------------------------------------------------------------------------------------|
| 26 | 13.066 | 0.96 | 82 | Phenol                | Phenol, 4-(2-aminoethyl)-                                                                                                      | 4-(2-aminoethyl)phenol                                                                                              |
| 27 | 13.633 | 0.66 | 86 | Fatty acid ester      | Dodecanoic acid, methyl ester                                                                                                  | Methyl laurate                                                                                                      |
| 28 | 14.111 | 0.35 | 66 | Silane                | trimethyl-(2-methylphenoxy)silane                                                                                              | Silane, trimethyl(o-tolyloxy)                                                                                       |
| 29 | 14.524 | 0.51 | 68 | Amide                 | 6-amino-6-oxohexanoic acid                                                                                                     | Adipamic acid                                                                                                       |
| 30 | 14.958 | 0.38 | 65 | Fatty acid ester      | Cyclohexyl 3-phenylpropanoate                                                                                                  | Cyclohexyl-.beta.-phenylpropionate                                                                                  |
| 31 | 15.390 | 0.73 | 68 | Fatty acid ester      | Benzenepropanoic acid, heptyl ester                                                                                            | Heptyl 3-phenylpropanoate                                                                                           |
| 32 | 15.984 | 2.25 | 81 | Aldehyde              | 2,3,4,5,6,7-hexahydroxyheptanal                                                                                                | d-Glycero-d-tallo-heptose                                                                                           |
| 33 | 16.869 | 0.44 | 90 | Fatty acid ester      | Hexadecanoic acid, methyl ester                                                                                                | Methyl palmitate                                                                                                    |
| 34 | 17.082 | 1.18 | 91 | Fatty acid            | cis-9-Hexadecenoic acid                                                                                                        | Palmitoleic acid                                                                                                    |
| 35 | 17.191 | 4.19 | 94 | Fatty acid            | hexadecanoic acid                                                                                                              | palmitic acid                                                                                                       |
| 36 | 17.542 | 0.76 | 71 | Ketone                | 9,9-dimethoxybicyclo[3.3.1]nonane-2,4-dione                                                                                    | 9,9-dimethoxybicyclo[3.3.1]nonane-2,4-dione                                                                         |
| 37 | 17.761 | 1.48 | 87 | Fatty acid            | cis-9-Hexadecenoic acid                                                                                                        | palmitoleic acid                                                                                                    |
| 38 | 18.034 | 1.12 | 90 | Fatty acid ester      | 9-Octadecenoic acid<br>(Z)-, methyl ester                                                                                      | Methyl oleate                                                                                                       |
| 39 | 18.171 | 2.80 | 86 | Amide                 | Tyramine, N-formyl-                                                                                                            | Formamide, N-(p-hydroxyphenethyl)-                                                                                  |
| 40 | 18.349 | 1.69 | 89 | Fatty acid            | (Z)-octadec-11-enoic acid                                                                                                      | cis-Vaccenic acid                                                                                                   |
| 41 | 18.450 | 0.61 | 78 | Ketone                | 9,9-dimethoxybicyclo[3.3.1]nonane-2,4-dione                                                                                    | 9,9-Dimethoxybicyclo[3.3.1]nona-2,4-dione                                                                           |
| 42 | 18.583 | 0.31 | 76 | Amide                 | (E)-8-methylnon-6-enamide                                                                                                      | 8-Methyl-6-nonenamide                                                                                               |
| 43 | 19.131 | 7.52 | 76 | Ketone                | Piperidine,<br>1-(4-piperidinylcarbonyl)-                                                                                      | 1-(piperidin-4-ylcarbonyl)piperidine                                                                                |
| 44 | 19.238 | 0.58 | 72 | Fatty acid ester      | 3-hydroxybutan-2-yl octadecanoate                                                                                              | 2-Hydroxy-1-methylpropyl stearate                                                                                   |
| 45 | 19.368 | 0.17 | 73 | Fatty acid ester      | Cyclopropanebutanoic acid,<br>2-[[2-[[2-[(2-pentylcyclopropyl)methyl]cyclopropyl]methyl]cyclopropyl]<br>methyl]-, methyl ester | Methyl<br>4-(2-([2-((2-[(2-pentylcyclopropyl)methyl]cyclopropyl)methyl)cyclopropyl)methyl)cyclopropyl)<br>Butanoate |
| 46 | 19.482 | 0.59 | 78 | Aldehyde              | (Z)-octadec-9-enal                                                                                                             | Olealdehyde                                                                                                         |
| 47 | 19.575 | 0.71 | 82 | Fatty acid ester      | Octadecanoic acid,<br>3-hydroxypropyl ester                                                                                    | Stearic acid, 3-hydroxypropyl ester                                                                                 |
| 48 | 19.762 | 2.46 | 74 | Ketone                | 5-(4-hydroxybutyl)imidazolidine-2,4-dione                                                                                      | Hydantoin, 5-(4-hydroxybutyl)-                                                                                      |
| 49 | 20.122 | 0.42 | 78 | Aldehyde              | (Z)-hexadec-7-enal                                                                                                             | (Z)-7-Hexadecenal                                                                                                   |
| 50 | 20.270 | 0.57 | 59 | Carboxylic acid ester | (4-methoxy-1,4,4a,5,8,8a-hexahydronaphthalen-1-yl) acetate                                                                     | Acetic acid,                                                                                                        |

|    |        |      |    |                  |                                                          |                                                               |
|----|--------|------|----|------------------|----------------------------------------------------------|---------------------------------------------------------------|
|    |        |      |    |                  |                                                          | 4-methoxy-1,4,4a,5,8,8a-hexahydronaphthalen-1-yl ester        |
| 51 | 20.321 | 0.47 | 73 | Fatty acid ester | methyl<br>8-[2-(2-hexylcyclopropyl)cyclopropyl]octanoate | [1,1'-Bicyclopropyl]-2-octanoic acid, 2'-hexyl-, methyl ester |
| 52 | 20.659 | 0.22 | 71 | Fatty acid       | octadec-17-ynoic acid                                    | Alkynyl Stearic Acid                                          |
| 53 | 20.706 | 0.43 | 76 | Fatty acid ester | Oleic acid, 3-hydroxypropyl ester                        | hydroxypropyl oleate                                          |
